# Supplementary material for: Genomic Analysis of Staphylococcus aureus Isolates Associated With Peracute Non-gangrenous or Gangrenous Mastitis and Comparison With Other Mastitis-Associated Staphylococcus aureus Isolates
Source: Front Microbiol. 2021 Jul 8;12:688819. doi: 10.3389/fmicb.2021.688819 (PMC8297832; doi:10.3389/fmicb.2021.688819)
Supplement: Supplementary file 2 [file Table_1.XLSX]

## Sheet: Taul1
Supplementary table 1. Distribution of putative virulence factors in 20 S. aureus isolates from bovine mastitis milk samples.
1, found; 0, not found; ND, blast analysis not performed due to the absence of relevant reference sequence. For factors found by blast analysis on whole genomes, identity (ID) and query cover (QC) percents together with corresponding E-value of the best hit are given.
Virulence factor (synonyms)	Related genes	Reference sequence IDa	Presence in 33 strain-specific S. aureus genomes according to Aureowiki	Sample_1	Sample_2	Sample_3	Sample_4	Sample_5	Sample_6	Sample_7	Sample_8	Sample_9	Sample_10	Sample_11	Sample_12	Sample_13	Sample_14	Sample_15	Sample_16	Sample_17	Sample_18	Sample_19	Sample_20
				Peracute non-gangrenous	Peracute gangrenous	Peracute gangrenous	Peracute non-gangrenous	Peracute gangrenous	Peracute gangrenous	Peracute non-gangrenous	Peracute non-gangrenous	Peracute gangrenous	Peracute gangrenous	Peracute gangrenous	Peracute gangrenous	Peracute gangrenous	Peracute non-gangrenous	Control clinical	Control subclinical	Control subclinical	Control clinical	Control subclinical	Control clinical
				CC97	CC133	CC522	CC151	CC133	CC133	CC133	CC151	CC151	CC479	CC522	CC151	CC133	CC97	CC151	CC97	CC151	CC97	CC133	CC151
				ST 97	ST 133	ST 522	ST 3140	ST 133	ST 133	ST 133	ST 3140	ST 151	ST 470	ST 522	ST 3140	ST 133	ST 97	ST 3140	ST 97	ST 151	ST 352	ST 133	ST 3140
				Spa t1008	Spa t1403	Spa t3576	Spa t529	Spa t1403	Spa t1403	Spa t1403	Spa t529	Spa t529	Spa t543	Spa t3576	Spa t529	Spa t1403	Spa t527	Spa t529	Spa t527	Spa t529	Spa t267	Spa t1403	Spa t529
Toxins
Hemolysins
Alpha hemolysin (alpha-toxin)	hla (hly)		1	1	1	1	1	1	1	1	1	1	1	1	1	1	1	1	1	1	1	1	1
Phospholipase C (Beta hemolysin,beta-toxin, sphingomyelinase)	hlb		0.88	1	1	1	1	1	1	1	1	1	1	1	1	1	1	1	1	1	1	1	1
Delta hemolysin (delta-lysin, delta-toxin)	hld	P0C1V1	0.91	1	QC: 100%, E: 5e-63, ID: 98.5%	QC: 100%, E: 1e-64, ID: 99%	QC: 100%, E: 1e-64, ID: 99%	QC: 100%, E: 5e-63, ID: 98.5%	QC: 100%, E: 5e-63, ID: 98.5%	QC: 100%, E: 5e-63, ID: 98.5%	QC: 100%, E: 1e-64, ID:99%	QC: 100%, E: 1e-64, ID:99%	QC: 100%, E: 1e-64, ID: 99%	QC: 100%, E: 1e-64, ID: 99%	QC: 100%, E: 1e-64, ID: 99%	QC: 100%, E: 5e-63, ID: 98.5%	1	QC: 100%, E: 1e-64, ID: 99%	1	QC: 100%, E: 1e-64, ID: 99%	1	QC: 100%, E: 5e-63, ID: 98.5%	QC: 100%, E: 1e-64, ID: 99%
Hemolysin III	—		1	1	1	1	1	1	1	1	1	1	1	1	1	1	1	1	1	1	1	1	1
Leukotoxins/leukocidins
Gamma hemolysin	hlgA		1	1	1	1	1	1	1	1	1	1	1	1	1	1	1	1	1	1	1	1	1
	hlgB		1	1	1	1	1	1	1	1	1	1	1	1	1	1	1	1	1	1	1	1	1
	hlgC		1	1	1	1	1	1	1	1	1	1	1	1	1	1	1	1	1	1	1	1	1
Panton-Valentine leukocidin	lukS-PV	(SAUSA300_RS07545)	0.06	0	0	0	0	0	0	0	0	0	0	0	0	0	0	0	0	0	0	0	0
	lukF-PV	—	—	ND	ND	ND	ND	ND	ND	ND	ND	ND	ND	ND	ND	ND	ND	ND	ND	ND	ND	ND	ND
Bi-component leukocidin LukMF'	lukM	[1262967]	—	0	1	1	1	1	1	1	1	1	1	1	1	1	0	1	0	1	1	1	1
	lukF'	[1262954]	—	0	1	1	1	1	1	1	1	1	1	1	1	1	0	1	0	1	1	1	1
Bi-component leukotoxin lukE-D / lukEv-Dv	lukD/lukDv	O54082, Q2FXB1	0.7	1	1	1	1	1	1	1	1	1	1	1	1	1	1	1	1	1	1	1	1
	lukE/lukEv	O54081, Q2FXB0	0.73	1	1	1	1	1	1	1	1	1	1	1	1	1	1	1	1	1	1	1	1
Bi-component leukocidin LukGH	lukG		1	1	1	1	1	1	1	1	1	1	1	1	1	1	1	1	1	1	1	1	1
	lukH		1	1	1	1	1	1	1	1	1	1	1	1	1	1	1	1	1	1	1	1	1
Phenol soluble modulins (PSM)
Phenol soluble modulins alpha	psmA1	A9JX05	0.3	QC: 100%, E: 2e-28, ID: 100.00%	QC: 100%, E: 2e-28, ID: 100.00%	QC: 100%, E: 2e-28, ID: 100.00%	QC: 100%, E: 2e-28, ID: 100.00%	QC: 100%, E: 2e-28, ID: 100.00%	QC: 100%, E: 2e-28, ID: 100.00%	QC: 100%, E: 2e-28, ID: 100.00%	QC: 100%, E: 2e-28, ID: 100.00%	QC: 100%, E: 2e-28, ID: 100.00%	QC: 100%, E: 2e-28, ID: 100.00%	QC: 100%, E: 2e-28, ID: 100.00%	QC: 100%, E: 2e-28, ID: 100.00%	QC: 100%, E: 2e-28, ID: 100.00%	QC: 100%, E: 2e-28, ID: 100.00%	QC: 100%, E: 2e-28, ID: 100.00%	QC: 100%, E: 2e-28, ID: 100.00%	QC: 100%, E: 2e-28, ID: 100.00%	QC: 100%, E: 2e-28, ID: 100.00%	QC: 100%, E: 2e-28, ID: 100.00%	QC: 100%, E: 2e-28, ID: 100.00%
	psmA2	A9JX06	0.3	QC: 100%, E: 2e-28, ID: 100.00%	QC: 100%, E: 2e-28, ID: 100.00%	QC: 100%, E: 2e-28, ID: 100.00%	QC: 100%, E: 2e-28, ID: 100.00%	QC: 100%, E: 2e-28, ID: 100.00%	QC: 100%, E: 2e-28, ID: 100.00%	QC: 100%, E: 2e-28, ID: 100.00%	QC: 100%, E: 2e-28, ID: 100.00%	QC: 100%, E: 2e-28, ID: 100.00%	QC: 100%, E: 2e-28, ID: 100.00%	QC: 100%, E: 2e-28, ID: 100.00%	QC: 100%, E: 2e-28, ID: 100.00%	QC: 100%, E: 2e-28, ID: 100.00%	QC: 100%, E: 2e-28, ID: 100.00%	QC: 100%, E: 2e-28, ID: 100.00%	QC: 100%, E: 2e-28, ID: 100.00%	QC: 100%, E: 2e-28, ID: 100.00%	QC: 100%, E: 2e-28, ID: 100.00%	QC: 100%, E: 2e-28, ID: 100.00%	QC: 100%, E: 2e-28, ID: 100.00%
	psmA3	A9JX07	0.3	QC: 100%, E: 5e-30, ID: 100.00%	QC: 100%, E: 5e-30, ID: 100.00%	QC: 100%, E: 5e-30, ID: 100.00%	QC: 100%, E: 5e-30, ID: 100.00%	QC: 100%, E: 5e-30, ID: 100.00%	QC: 100%, E: 5e-30, ID: 100.00%	QC: 100%, E: 5e-30, ID: 100.00%	QC: 100%, E: 5e-30, ID: 100.00%	QC: 100%, E: 5e-30, ID: 100.00%	QC: 100%, E: 5e-30, ID: 100.00%	QC: 100%, E: 5e-30, ID: 100.00%	QC: 100%, E: 5e-30, ID: 100.00%	QC: 100%, E: 5e-30, ID: 100.00%	QC: 100%, E: 5e-30, ID: 100.00%	QC: 100%, E: 5e-30, ID: 100.00%	QC: 100%, E: 5e-30, ID: 100.00%	QC: 100%, E: 5e-30, ID: 100.00%	QC: 100%, E: 5e-30, ID: 100.00%	QC: 100%, E: 5e-30, ID: 100.00%	QC: 100%, E: 5e-30, ID: 100.00%
	psmA4	A9JX08	0.27	QC: 100%, E: 1e-26, ID: 100.00	QC: 100%, E: 1e-26, ID: 100.00	QC: 100%, E: 1e-26, ID: 100.00	QC: 100%, E: 1e-26, ID: 100.00	QC: 100%, E: 1e-26, ID: 100.00	QC: 100%, E: 1e-26, ID: 100.00	QC: 100%, E: 1e-26, ID: 100.00	QC: 100%, E: 1e-26, ID: 100.00	QC: 100%, E: 1e-26, ID: 100.00	QC: 100%, E: 1e-26, ID: 100.00	QC: 100%, E: 1e-26, ID: 100.00	QC: 100%, E: 1e-26, ID: 100.00	QC: 100%, E: 1e-26, ID: 100.00	QC: 100%, E: 1e-26, ID: 100.00	QC: 100%, E: 1e-26, ID: 100.00	QC: 100%, E: 1e-26, ID: 100.00	QC: 100%, E: 1e-26, ID: 100.00	QC: 100%, E: 1e-26, ID: 100.00	QC: 100%, E: 1e-26, ID: 100.00	QC: 100%, E: 1e-26, ID: 100.00
Phenol soluble modulins beta	psmβ1	(NWMN_RS06145)	0.88	1	1	1	1	QC: 98%, E: 7e-62, ID: 98.50	1	1	1	1	1	1	1	1	1	1	1	1	1	1	1
	psmβ2	(SACOL_RS06080)	0.82	1	1	0	1	1	1	1	1	1	1	0	1	1	1	1	1	1	1	1	1
Exfoliative toxins
Exfoliative toxin type A	eta		1	1	1	1	1	1	1	1	1	1	1	1	1	1	1	1	1	1	1	1	1
Exfoliative toxin type B	etb	P09332 (—)	—	0	0	0	0	0	0	0	0	0	0	0	0	0	0	0	0	0	0	0	0
Exfoliative toxin type C	etc	—	—	ND	ND	ND	ND	ND	ND	ND	ND	ND	ND	ND	ND	ND	ND	ND	ND	ND	ND	ND	ND
Exfoliative toxin type D	etd	—	—	ND	ND	ND	ND	ND	ND	ND	ND	ND	ND	ND	ND	ND	ND	ND	ND	ND	ND	ND	ND
Staphylococcal superantigens (Sags)
Toxic shock syndrome toxin	tst	P06886	0.09	0	0	0	1	0	0	0	0	0	0	0	1	0	0	0	0	0	0	0	1
Staphylococcal superantigen-like (SSL) proteins (Staphylococcal exotoxin-like family of proteins SET)	ssl1		1	1	1	1	1	1	1	1	1	1	1	1	1	1	1	1	1	1	1	1	1
	ssl2		1	1	1	1	1	1	1	1	1	1	1	1	1	1	1	1	1	1	1	1	1
	ssl3		1	1	1	1	1	1	1	1	1	1	1	1	1	1	1	1	1	1	1	1	1
	ssl4	(NWMN_RS02210)	0.82	1	1	1	0	1	1	1	0	0	1	1	0	1	1	0	1	0	1	1	0
	ssl5		0.94	1	1	1	1	1	1	1	1	1	1	1	1	1	1	1	1	1	1	1	1
	ssl6	(NWMN_RS02225)	0.33	0	1	1	0	1	1	1	0	0	0	1	0	1	0	0	0	0	0	1	0
	ssl7	(NWMN_RS02230)	0.94	1	1	0	1	1	1	1	1	1	0	0	1	1	1	1	1	1	1	1	1
	ssl8	(NWMN_RS02235)	0.73	1	1	0	1	1	1	1	1	1	0	0	1	1	1	1	1	1	1	1	1
	ssl9	(NWMN_RS02240)	0.94	0	1	1	1	1	1	1	1	1	0	1	1	1	1	1	1	1	1	1	1
	ssl10		0.94	1	1	1	1	1	1	1	1	1	1	1	1	1	1	1	1	1	1	1	1
	ssl11		0.94	1	1	1	1	1	1	1	1	1	1	1	1	1	1	1	1	1	1	1	1
	ssl12		1	1	1	1	1	1	1	1	1	1	1	1	1	1	1	1	1	1	1	1	1
	ssl13		1	1	1	1	1	1	1	1	1	1	1	1	1	1	1	1	1	1	1	1	1
	ssl14		1	1	1	1	1	1	1	1	1	1	1	1	1	1	1	1	1	1	1	1	1
Enterotoxins and enterotoxin-like toxins
Enterotoxin gene cluster 2 (egc-2, seg-sei-sem-sen-seo-seu)	entG (seg)	P0A0L8 (SA_RS09240)	0.39	0	0	0	1	0	0	0	1	1	1	0	1	0	0	1	0	1	0	0	1
	sei	(SA_RS09260)	0.39	0	0	0	1	0	0	0	1	1	1	0	1	0	0	1	0	1	0	0	1
	sem (selm)	(SA_RS09265)	0.39	0	0	0	1	0	0	0	1	1	1	0	1	0	0	1	0	1	0	0	1
	sen (seln)	(SA_RS09245)	0.39	0	0	0	1	0	0	0	1	1	1	0	1	0	0	1	0	1	0	0	1
	seo (selo)	(SA_RS09270)	0.42	0	0	0	1	0	0	0	1	1	1	0	1	0	0	1	0	1	0	0	1
	seu (selu)	[ WP_000764692]	—	0	0	0	1	0	0	0	1	1	1	0	1	0	0	1	0	1	0	0	1
Enterotoxin A	sea (enta)	P0A0L2 (—)	—	0	0	0	0	0	0	0	0	0	0	0	0	0	0	0	0	0	0	0	0
Enterotoxin B	seb (entb)	P01552 (—)	—	0	0	0	0	0	0	0	0	0	0	0	0	0	0	0	0	0	0	0	0
Bovine variant of enterotoxin C (staphylococcal enterotoxin C-bovine)	sec-bov	[SAB_RS01930]	—	0	0	0	1	0	0	0	0	0	0	0	1	0	0	0	0	0	0	0	1
Staphylococcal enterotoxin type c-1	entC1	P01553	—	0	0	0	0	0	0	0	0	0	0	0	0	0	0	0	0	0	0	0	0
Staphylococcal enterotoxin type c-2	entC2	P34071	—	0	0	0	0	0	0	0	0	0	0	0	0	0	0	0	0	0	0	0	0
Staphylococcal enterotoxin type c-3	entC3	P0A0L5	0.09	0	0	0	0	0	0	0	0	0	0	0	0	0	0	0	0	0	0	0	0
Enterotoxin D	sed (entd)	P20723 (—)	—	0	0	0	0	0	0	0	0	0	0	0	0	0	0	0	0	0	0	0	0
Enterotoxin E	see	P12993 (—)	—	0	0	0	0	0	0	0	0	0	0	0	0	0	0	0	0	0	0	0	0
Enterotoxin H	seh	P0A0M0 (—)	—	0	0	0	0	0	0	0	0	0	0	0	0	0	0	0	0	0	0	0	0
Enterotoxin J	sej (selj)	[WP_031875254]	—	0	0	0	0	0	0	0	0	0	0	0	0	0	0	0	0	0	0	0	0
Enterotoxin K	sek (selk)	(SACOL_RS04550)	0.18	0	0	0	0	0	0	0	0	0	0	0	0	0	0	0	0	0	0	0	0
Eenterotoxin L	sel (sell)	(SA_RS10430)	0.09	0	0	0	1	0	0	0	0	0	0	0	1	0	0	0	0	0	0	0	1
Enterotoxin P	sep	(SA_RS10125)	0.36	0	0	0	0	0	0	0	0	0	0	0	0	0	0	0	0	0	0	0	0
Enterotoxin Q	seq	(SAUSA300_RS04325)	0.21	0	0	0	0	0	0	0	0	0	0	0	0	0	0	0	0	0	0	0	0
Enterotoxin R	ser (selr)	[BAC97795]	—	0	0	0	0	0	0	0	0	0	0	0	0	0	0	0	0	0	0	0	0
Enterotoxin S	ses	[WP_032492129]	—	0	0	0	0	0	0	0	0	0	0	0	0	0	0	0	0	0	0	0	0
Enterotoxin T	set	[WP_031888057]	—	0	0	0	0	0	0	0	0	0	0	0	0	0	0	0	0	0	0	0	0
Enterotoxin-like V	seklv	WP_043859283	—	0	0	0	0	0	0	0	0	0	0	0	0	0	0	0	0	0	0	0	0
Enterotoxin-like W	—	[MN257146.1]	—	1	1	1	1	1	1	1	1	1	1	1	1	1	1	1	1	1	1	1	1
Enterotoxin-like X	selx	G0Z026	0.85	1	1	1	1	1	1	1	1	1	1	1	1	1	1	1	1	1	1	1	1
Enterotoxin-like Y	sey (sely)	[WP_000644941]	—	0	0	0	1	0	0	0	1	1	0	0	1	0	0	1	0	1	0	0	1
Enterotoxin-like z	selz	[WP_001225809]	—	0	0	0	1	0	0	0	1	1	0	0	1	0	0	1	0	1	0	0	1
Enterotoxin Yent1	yent1	(SA_RS09255)	0.18	0	0	0	0	0	0	0	0	0	0	0	0	0	0	0	0	0	0	0	0
Enterotoxin Yent2	yent2	(SA_RS09250)	0.36	0	0	0	0	0	0	0	0	0	0	0	0	0	0	0	0	0	0	0	0
Host immune evasion
Capsule
Capsular polysaccharide (types 5 and 8) biosynthesis proteins capA-capG	capA		1	1	1	1	1	1	1	1	1	1	1	1	1	1	1	1	1	1	1	1	1
	capB		1	1	1	1	1	1	1	1	1	1	1	1	1	1	1	1	1	1	1	1	1
	capC		1	1	1	1	1	1	1	1	1	1	1	1	1	1	1	1	1	1	1	1	1
	capD		0.97	1	1	1	1	1	1	1	1	1	1	1	1	1	1	1	1	1	1	1	1
	capE		1	1	1	1	1	1	1	1	1	1	1	1	1	1	1	1	1	1	1	1	1
	capF		1	1	1	1	1	1	1	1	1	1	1	1	1	1	1	1	1	1	1	1	1
	capG		1	1	1	1	1	1	1	1	1	1	1	1	1	1	1	1	1	1	1	1	1
Capsular polysaccharide type 5 biosynthesis proteins cap5H-cap5K	cap5H	(SACOL_RS00725)	0.58	QC: 100%, E: 0.0, ID: 99.08%	0	0	0	0	0	0	0	0	0	0	0	0	QC: 100%, E: 0.0, ID: 99.02%	0	QC: 100%, E: 0.0, ID: 99.02%	0	QC: 100%, E: 0.0, ID: 99.02%	0	0
	cap5I	(SACOL_RS00730)	0.55	QC: 100%, E: 0.0, ID: 99.01%	0	0	0	0	0	0	0	0	0	0	0	0	QC: 100%, E: 0.0, ID: 98.92%	0	QC: 100%, E: 0.0, ID: 98.92%	0	QC: 100%, E: 0.0, ID: 98.92%	0	0
	cap5J	(SACOL_RS00735)	0.55	QC: 100%, E: 0.0, ID: 99.40%	0	0	0	0	0	0	0	0	0	0	0	0	QC: 100%, E: 0.0, ID: 99.40%	0	QC: 100%, E: 0.0, ID: 99.40%	0	QC: 100%, E: 0.0, ID: 99.31%	0	0
	cap5K	(SACOL_RS00740)	0.58	QC: 100%, E: 0.0, ID: 98.84%	0	0	0	0	0	0	0	0	0	0	0	0	QC: 100%, E: 0.0, ID: 98.84%	0	QC: 100%, E: 0.0, ID: 98.84%	0	QC: 100%, E: 0.0, ID: 98.84%	0	0
Capsular polysaccharide type 8 biosynthesis proteins cap8H-cap8K	cap8H	—	—	ND	1	1	1	1	1	1	1	1	1	1	1	1	ND	1	ND	1	ND	1	1
	cap8I	—	—	ND	1	1	1	1	1	1	1	1	1	1	1	1	ND	1	ND	1	ND	1	1
	cap8J	—	—	ND	1	1	1	1	1	1	1	1	1	1	1	1	ND	1	ND	1	ND	1	1
	cap8K	—	—	ND	1	1	1	1	1	1	1	1	1	1	1	1	ND	1	ND	1	ND	1	1
Capsular polysaccharide (types 5 and 8) biosynthesis proteins capL-capP	capL		1	1	1	1	1	1	1	1	1	1	1	1	1	1	1	1	1	1	1	1	1
	capM		1	1	1	1	1	1	1	1	1	1	1	1	1	1	1	1	1	1	1	1	1
	capN		1	1	1	1	1	1	1	1	1	1	1	1	1	1	1	1	1	1	1	1	1
	capO		1	1	1	1	1	1	1	1	1	1	1	1	1	1	1	1	1	1	1	1	1
	capP		1	1	1	1	1	1	1	1	1	1	1	1	1	1	1	1	1	1	1	1	1
Other genes related to the immune evasion
Staphylococcal complement inhibitor	scn		0.67	1	1	1	1	1	1	1	1	1	1	1	1	1	1	1	1	1	1	1	1
Ruminant-specific Staphylococcal complement inhibitor variant		[ADN53656.1]	—	QC: 100%, E: 2e-140, ID: 90.43%	QC: 100%, E: 0.0, ID: 99.73%	QC: 100%, E: 0.0, ID: 100.00%	0	QC: 100%, E: 0.0. ID: 99.73%	QC: 100%, E: 0.0, ID: 99.73%	QC: 100%, E: 0.0, ID: 99.73%	0	0	0	QC: 100%, E: 0.0, ID: 100.00%	0	QC: 100%, E: 0.0, ID: 99.73%	QC: 100%, E: 4e-147, ID: 91.47%	0	QC: 100%, E: 4e-147, ID: 91.47%	0	0	QC: 100%, E: 0.0, ID: 99.73%	0
Chemotaxis inhibitory protein CHIPS	chp	A6QIG7 (NWMN_RS10800)	0.45	0	0	0	0	0	0	0	0	0	0	0	0	0	0	0	0	0	0	0	0
(Extracellular) Fibrinogen binding protein	efb (fib)		1	1	1	1	1	1	1	1	1	1	1	1	1	1	1	1	1	1	1	1	1
IgG-binding protein SBI	sbi		1	1	1	1	1	1	1	1	1	1	1	1	1	1	1	1	1	1	1	1	1
Phosphatidylglycerol lysyltransferase	mprF (fmtC)		1	1	1	1	1	1	1	1	1	1	1	1	1	1	1	1	1	1	1	1	1
Oleate hydratase	—		1	1	1	1	1	1	1	1	1	1	1	1	1	1	1	1	1	1	1	1	1
FPRL1 inhibitory protein (FLIPr)	flr	Q5HGS8	0.94	1	QC: 100%, E: 1e-129, ID: 87.93%	1	1	QC: 100%, E: 1e-129, ID: 87.93%	QC: 100%, E: 2e-131, ID: 88.18%	QC: 100%, E: 2e-131, ID: 88.18%	1	1	1	1	1	QC: 100%, E: 2e-131, ID: 88.18%	1	1	1	1	1	QC: 100%, E: 2e-131, ID: 88.18%	1
O-acetyltransferase OatA	oatA		1	1	1	1	1	1	1	1	1	1	1	1	1	1	1	1	1	1	1	1	1
Exoenzymes
Iron uptake and metabolism
Heme related
Iron-regulated surface determinat genes and sortases A and B	isdA (frpA, sasE, stbA)		1	1	1	1	1	1	1	1	1	1	1	1	1	1	1	1	1	1	1	1	1
	isdB (frpB, sasJ, sirH)		0.97	1	1	1	1	1	1	1	1	1	1	1	1	1	1	1	1	1	1	1	1
	isdC		1	1	1	1	1	1	1	1	1	1	1	1	1	1	1	1	1	1	1	1	1
	isdD		1	1	1	1	1	1	1	1	1	1	1	1	1	1	1	1	1	1	1	1	1
	isdE		1	1	1	1	1	1	1	1	1	1	1	1	1	1	1	1	1	1	1	1	1
	isdF		1	1	1	1	1	1	1	1	1	1	1	1	1	1	1	1	1	1	1	1	1
	isdG		1	1	1	1	1	1	1	1	1	1	1	1	1	1	1	1	1	1	1	1	1
	isdH (harA, sasI)		1	1	1	1	1	1	1	1	1	1	1	1	1	1	1	1	1	1	1	1	1
	isdI		1	1	1	1	1	1	1	1	1	1	1	1	1	1	1	1	1	1	1	1	1
	srtA (sortA)		1	1	1	1	1	1	1	1	1	1	1	1	1	1	1	1	1	1	1	1	1
	srtB (sortB)		0.97	1	1	1	1	1	1	1	1	1	1	1	1	1	1	1	1	1	1	1	1
Siderophore related
Staphyloferrin A biosynthesis related proteins	sfnaA (sfaA)		1	1	1	1	1	1	1	1	1	1	1	1	1	1	1	1	1	1	1	1	1
	sfnaB (sfaB)		1	1	1	1	1	1	1	1	1	1	1	1	1	1	1	1	1	1	1	1	1
	sfnaC (sfaC)		1	1	1	1	1	1	1	1	1	1	1	1	1	1	1	1	1	1	1	1	1
	sfnaD (sfaD)		1	1	1	1	1	1	1	1	1	1	1	1	1	1	1	1	1	1	1	1	1
ABC transporter substrate-binding protein (for staphyloferrin A)	htsA		1	1	1	1	1	1	1	1	1	1	1	1	1	1	1	1	1	1	1	1	1
Iron ABC transporter permease	htsB		1	1	1	1	1	1	1	1	1	1	1	1	1	1	1	1	1	1	1	1	1
Iron-dicitrate ABC transporter permease	htsC		1	1	1	1	1	1	1	1	1	1	1	1	1	1	1	1	1	1	1	1	1
Staphyloferrin B synthesis related proteins	sbnA		1	1	1	1	1	1	1	1	1	1	1	1	1	1	1	1	1	1	1	1	1
	sbnB		1	1	1	1	1	1	1	1	1	1	1	1	1	1	1	1	1	1	1	1	1
	sbnC		1	1	1	1	1	1	1	1	1	1	1	1	1	1	1	1	1	1	1	1	1
	sbnD		1	1	1	1	1	1	1	1	1	1	1	1	1	1	1	1	1	1	1	1	1
	sbnE		1	1	1	1	1	1	1	1	1	1	1	1	1	1	1	1	1	1	1	1	1
	sbnF		1	1	1	1	1	1	1	1	1	1	1	1	1	1	1	1	1	1	1	1	1
	sbnG		1	1	1	1	1	1	1	1	1	1	1	1	1	1	1	1	1	1	1	1	1
	sbnH		1	1	1	1	1	1	1	1	1	1	1	1	1	1	1	1	1	1	1	1	1
	sbnI		1	1	1	1	1	1	1	1	1	1	1	1	1	1	1	1	1	1	1	1	1
Staphyloferrin B	sirA		1	1	1	1	1	1	1	1	1	1	1	1	1	1	1	1	1	1	1	1	1
	sirB		1	1	1	1	1	1	1	1	1	1	1	1	1	1	1	1	1	1	1	1	1
	sirC		1	1	1	1	1	1	1	1	1	1	1	1	1	1	1	1	1	1	1	1	1
Xenosiderophore related
Xenosiderophore transport related proteins	fhuC		1	1	1	1	1	1	1	1	1	1	1	1	1	1	1	1	1	1	1	1	1
	fhuB		1	1	1	1	1	1	1	1	1	1	1	1	1	1	1	1	1	1	1	1	1
	fhuG		1	1	1	1	1	1	1	1	1	1	1	1	1	1	1	1	1	1	1	1	1
	fhuD1	(SACOL_RS10495)	0.36	1	0	0	0	0	0	0	0	0	0	0	0	0	1	0	1	0	1	0	0
	fhuD2		1	1	1	1	1	1	1	1	1	1	1	1	1	1	1	1	1	1	1	1	1
Inorganoc iron related
Ferrous iron transporter A	feoA		0.97	1	1	1	1	1	1	1	1	1	1	1	1	1	1	1	1	1	1	1	1
Other exoenzymes
Catalase	katA		1	1	1	1	1	1	1	1	1	1	1	1	1	1	1	1	1	1	1	1	1
Staphylocoagulase	coa		0.97	1	1	1	1	1	1	1	1	1	1	1	1	1	1	1	1	1	1	1	1
von Willebrand factor binding protein	vwb	(NWMN_RS04285)	0.79	1	1	1	QC: 52%, E: 0.0, ID: 91.59%	1	1	1	QC: 52%, E: 0.0, ID: 91.59%	QC: 52%, E: 0.0, ID: 91.59%	1	1	1	1	1	QC: 52%, E: 0.0, ID: 91.59%	1	QC: 52%, E: 0.0, ID: 91.59%	QC: 52%, E: 0.0, ID: 92.32%	1	QC: 52%, E: 0.0, ID: 91.59%
Glyceraldehyde-3-phosphate dehydrogenase 1	gapA1		1	1	1	1	1	1	1	1	1	1	1	1	1	1	1	1	1	1	1	1	1
Glyceraldehyde-3-phosphate dehydrogenase 2	gapA2 (gapB)		1	1	1	1	1	1	1	1	1	1	1	1	1	1	1	1	1	1	1	1	1
Hyaluronate lyase	hysA		1	1	1	1	1	1	1	1	1	1	1	1	1	1	1	1	1	1	1	1	1
Staphylokinase	sak	P68802 (NWMN_RS10810)	0.7	0	0	0	0	0	0	0	0	0	0	0	0	0	0	0	0	0	0	0	0
Thermonuclease	nuc		1	1	1	1	1	1	1	1	1	1	1	1	1	1	1	1	1	1	1	1	1
Zinc metalloproteinase aureolysin	aur		1	1	1	1	1	1	1	1	1	1	1	1	1	1	1	1	1	1	1	1	1
Serine protease SplA	splA		0.7	1	1	1	1	1	1	1	1	1	1	1	1	1	1	1	1	1	1	1	1
Serine protease SplB	splB		0.7	1	1	1	1	1	1	1	1	1	1	1	1	1	1	1	1	1	1	1	1
Serin protease SplC	splC		0.76	1	1	1	1	1	1	1	1	1	1	1	1	1	1	1	1	1	1	1	1
Serine protease SplD	splD	Q2FXC5	0.52	1	0	1	0	0	0	0	0	0	1	1	0	0	1	0	1	0	1	0	0
Serine protease SplE	splE	Q2FXC7	0.3	1	0	1	1	0	0	0	1	1	1	1	1	0	0	1	0	1	1	0	1
Serine protease SplF	splF	Q2FXC8	0.76	1	1	1	1	1	1	1	1	1	0	1	1	1	0	1	0	1	1	1	1
Staphopain (Cysteine protease) precursors A and B, and staphostatin B/sspC protein	scpA		1	1	1	1	1	1	1	1	1	1	1	1	1	1	1	1	1	1	1	1	1
	sspB		1	1	1	1	1	1	1	1	1	1	1	1	1	1	1	1	1	1	1	1	1
	sspP		0.97	1	1	1	1	1	1	1	1	1	1	1	1	1	1	1	1	1	1	1	1
	sspC		0.97	1	1	1	1	1	1	1	1	1	1	1	1	1	1	1	1	1	1	1	1
Triacylglycerol lipase (Lipase 1)	lip1/gehA		1	1	1	1	1	1	1	1	1	1	1	1	1	1	1	1	1	1	1	1	1
Lipase 2	lip2/gehB		0.97	1	1	1	1	1	1	1	1	1	1	1	1	1	1	1	1	1	1	1	1
Adherence
MSCRAMM
Extracellular matrix-binding protein ebh (hyperosmolarity resistance protein)	ebh		0.7	1	1	1	1	1	1	1	1	1	1	1	1	1	1	1	1	1	1	1	1
Extracellular matrix protein-binding protein emp	emp		0.97	1	1	1	1	1	1	1	1	1	1	1	1	1	1	1	1	1	1	1	1
Collagen-binding adhesion protein	cna	Q53654	—	0	0	1	0	0	0	0	0	0	1	1	0	0	0	0	0	0	0	0	0
Elastin binding protein EbpS	ebpS		1	1	1	1	1	1	1	1	1	1	1	1	1	1	1	1	1	1	1	1	1
Enolase	eno		1	1	1	1	1	1	1	1	1	1	1	1	1	1	1	1	1	1	1	1	1
Extracellular adherence protein/MHC analogous protein	eap/map		0.45	1	1	1	1	1	1	1	1	1	1	1	1	1	1	1	1	1	1	1	1
Fibronectin binding proteins	fnbA		0.97	1	1	1	1	1	1	1	1	1	1	1	1	1	1	1	1	1	1	1	1
	fnbB	A0A0H2XKG3	0.73	1	1	0	0	1	1	1	0	0	1	0	0	1	1	0	1	0	1	1	0
Fibronectin/fibrinogen binding-like protein	fbpA		1	1	1	1	1	1	1	1	1	1	1	1	1	1	1	1	1	1	1	1	1
Intercellular adhesin	icaR		1	1	1	1	1	1	1	1	1	1	1	1	1	1	1	1	1	1	1	1	1
	icaA		1	1	1	1	1	1	1	1	1	1	1	1	1	1	1	1	1	1	1	1	1
	icaB		0.97	1	1	1	1	1	1	1	1	1	1	1	1	1	1	1	1	1	1	1	1
	icaC		1	1	1	1	1	1	1	1	1	1	1	1	1	1	1	1	1	1	1	1	1
	icaD		0.76	1	1	1	1	1	1	1	1	1	1	1	1	1	1	1	1	1	1	1	1
Immunoglobulin G-binding protein A (Staphylococcal protein A)	spa		1	1	1	1	1	1	1	1	1	1	1	1	1	1	1	1	1	1	1	1	1
Serine-rich adhesin for platelets	sraP (sasA)		1	1	1	1	1	1	1	1	1	1	1	1	1	1	1	1	1	1	1	1	1
Predicted cell-wall-anchored proteins	sasB	—	—	ND	ND	ND	ND	ND	ND	ND	ND	ND	ND	ND	ND	ND	ND	ND	ND	ND	ND	ND	ND
	sasC		0.82	1	1	1	1	1	1	1	1	1	1	1	1	1	1	1	1	1	1	1	1
	sasD	(NWMN_RS00440)	0.88	1	0	0	1	0	0	0	1	1	0	0	1	0	1	1	1	1	1	0	1
Surface protein F	sasF		1	1	1	1	1	1	1	1	1	1	1	1	1	1	1	1	1	1	1	1	1
Surface protein G	sasG	Q2G2B2	0.15	1	0	1	0	0	0	0	0	0	1	1	0	0	1	0	1	0	1	0	0
Virulence -associated cell-wall-anchored protein	sasH (adsA)		1	1	1	1	1	1	1	1	1	1	1	1	1	1	1	1	1	1	1	1	1
Predicted cell-wall-anchored protein sasK	sasK	(SA_RS13635)	0.48	QC: 100%, E: 0.0, ID: 99.06%	QC: 100%, E: 0.0, ID: 98.90%	QC: 100%, E: 0.0, ID: 99.21%	0	QC: 100%, E: 0.0, ID: 98.90%	QC: 100%, E: 0.0, ID: 98.90%	QC: 100%, E: 0.0, ID: 98.90%	0	0	QC: 100%, E: 0.0, ID: 98.90%	QC: 100%, E: 0.0, ID: 99.21%	0	QC: 100%, E: 0.0, ID: 98.90%	QC: 86%, E: 3e-162, ID: 98.75%	0	QC: 86%, E: 3e-162, ID: 98.75%	0	QC: 100%, E: 0.0, ID: 99.06%	QC: 100%, E: 0.0, ID: 98.90%	0
Surface protein involved in biofilm formation	bap	—	—	ND	ND	ND	ND	ND	ND	ND	ND	ND	ND	ND	ND	ND	ND	ND	ND	ND	ND	ND	ND
Triosephosphate isomerase (TIM) (TPI)	tpiA	Q6GIL6	1	1	1	1	1	1	1	1	1	1	1	1	1	1	1	1	1	1	1	1	1
Sdr-family
Bone sialoprotein-binding protein	bbp	Q14U76	—	1	0	0	0	0	0	0	0	1	0	1	0	0	0	0	0	0	0	0	0
Clumping factor A	clfA	Q53653	0.82	1	1	1	1	1	1	1	1	1	1	1	1	1	1	1	1	1	1	1	1
Clumping factor B	clfB		1	1	1	1	1	1	1	1	1	1	1	1	1	1	1	1	1	1	1	1	1
Ser-Asp rich fibrinogen-binding protein C	sdrC	Q7A781	0.97	1	1	1	1	1	1	1	1	1	1	1	1	1	1	1	1	1	1	1	1
Ser-Asp rich fibrinogen-binding protein D	sdrD	Q2G0L4	0.91	1	1	1	0	QC:85%, E: 0.0, ID: 91.60%	1	1	0	0	0	QC: 77%, E: 0.0, ID:90.44%	0	QC: 90%, E: 0.0, ID: 91.24%	0	0	0	0	0	1	0
Serine-aspartate repeat-containing protein E	sdrE	O86489	0.88	0	1	1	1	1	1	1	1	0	1	1	1	1	0	1	0	1	1	1	1
Ser-Asp rich fibrinogen-binding proteins	sdrF	—	—	ND	ND	ND	ND	ND	ND	ND	ND	ND	ND	ND	ND	ND	ND	ND	ND	ND	ND	ND	ND
	sdrG	—	—	ND	ND	ND	ND	ND	ND	ND	ND	ND	ND	ND	ND	ND	ND	ND	ND	ND	ND	ND	ND
SdrH protein	sdrH		1	1	1	1	1	1	1	1	1	1	1	1	1	1	1	1	1	1	1	1	1
SdrI Surface protein	sdrI	—	—	ND	ND	ND	ND	ND	ND	ND	ND	ND	ND	ND	ND	ND	ND	ND	ND	ND	ND	ND	ND
Secretion systems
Type VII secretion system
Type VII secretion system	esxA		1	1	1	1	1	1	1	1	1	1	1	1	1	1	1	1	1	1	1	1	1
	esaA		1	1	1	1	1	1	1	1	1	1	1	1	1	1	1	1	1	1	1	1	1
	essA		1	1	1	1	1	1	1	1	1	1	1	1	1	1	1	1	1	1	1	1	1
	esaB	Q5HJ88	0.97	QC: 100%, E: 2e-99, ID: 93.42%	QC: 100%, E: 5e-126, ID: 100.00%	QC: 100%, E: 5e-126, ID: 100.00%	QC: 100%, E: 5e-126, ID: 100.00%	QC: 100%, E: 5e-126, ID: 100.00%	QC: 100%, E: 5e-126, ID: 100.00%	QC: 100%, E: 5e-126, ID: 100.00%	QC: 100%, E: 5e-126, ID: 100.00%	QC: 100%, E: 5e-126, ID: 100.00%	QC: 100%, E: 2e-124, ID: 99.59%	QC: 100%, E: 5e-126, ID: 100.00%	QC: 100%, E: 5e-126, ID: 100.00%	QC: 100%, E: 5e-126, ID: 100.00%	QC: 100%, E: 2e-99, ID: 93.42%	QC: 100%, E: 5e-126, ID: 100.00%	QC: 100%, E: 2e-99, ID: 93.42%	QC: 100%, E: 5e-126, ID: 100.00%	QC: 100%, E: 2e-99, ID: 93.42%	QC: 100%, E: 5e-126, ID: 100.00%	QC: 100%, E: 5e-126, ID: 100.00%
	essB		1	1	1	1	1	1	1	1	1	1	1	1	1	1	1	1	1	1	1	1	1
	essC	Q6GK24	1	QC: 100%, E: 0.0, ID: 97.90%	QC: 100%, E: 0.0, ID: 98.00%	QC: 100%, E: 0.0, ID: 97.50%	QC: 100%, E: 0.0, ID: 97.90%	QC: 100%, E: 0.0, ID: 98.00%	QC: 100%, E: 0.0, ID: 98.00%	QC: 100%, E: 0.0, ID: 98.00%	QC: 100%, E: 0.0, ID: 97.90%	QC: 100%, E: 0.0, ID: 97.90%	QC: 100%, E: 0.0, ID: 97.40%	QC: 100%, E: 0.0, ID: 97.50%	QC: 100%, E: 0.0, ID: 97.90%	QC: 100%, E: 0.0, ID: 98.00%	QC: 100%, E: 0.0, ID: 97.90%	QC: 100%, E: 0.0, ID: 97.90%	QC: 100%, E: 0.0, ID: 97.90%	QC: 100%, E: 0.0, ID: 97.90%	QC: 100%, E: 0.0, ID: 97.90%	QC: 100%, E: 0.0, ID: 98.00%	QC: 100%, E: 0.0, ID: 97.90%
	esxC (esaC)		0.67	1	1	1	1	1	1	1	1	1	1	1	1	1	1	1	1	1	1	1	1
	esxB		0.67	1	1	1	1	1	1	1	1	1	1	1	1	1	1	1	1	1	1	1	1
	esaE	Q2G181	0.67	QC: 100%, E: 0.0, ID: 98.07	QC: 100%, E: 0.0, ID: 98.52	QC: 100%, E: 0.0, ID: 98.96	QC: 100%, E: 0.0, ID: 98.37	QC: 100%, E: 0.0, ID: 98.52	QC: 100%, E: 0.0, ID: 98.52	QC: 100%, E: 0.0, ID: 98.52	QC: 100%, E: 0.0, ID: 98.37	QC: 100%, E: 0.0, ID: 98.22	QC: 100%, E: 0.0, ID: 99.11	QC: 100%, E: 0.0, ID: 98.96	QC: 100%, E: 0.0, ID: 98.37	QC: 100%, E: 0.0, ID: 98.52	QC: 100%, E: 0.0, ID: 98.07	QC: 100%, E: 0.0, ID: 98.37	QC: 100%, E: 0.0, ID: 98.07	QC: 100%, E: 0.0, ID: 98.22	QC: 100%, E: 0.0, ID: 98.07	QC: 100%, E: 0.0, ID: 98.52	QC: 100%, E: 0.0, ID: 98.37
	esxD		0.67	1	1	1	1	1	1	1	1	1	1	1	1	1	1	1	1	1	1	1	1
	essD (esaD)		—	1	1	1	1	1	1	1	1	1	1	1	1	1	1	1	1	1	1	1	1
Sec secretion system
Protein translocase subunit SecA (Protein translocase subunit SecA 1)	secA (secA1)		1	1	1	1	1	1	1	1	1	1	1	1	1	1	1	1	1	1	1	1	1
Bifunctional preprotein translocase subunit SecD/SecF	secDF		1	1	1	1	1	1	1	1	1	1	1	1	1	1	1	1	1	1	1	1	1
Protein translocase subunits Y, E and G	secY		1	1	1	1	1	1	1	1	1	1	1	1	1	1	1	1	1	1	1	1	1
	secE		1	1	1	1	1	1	1	1	1	1	1	1	1	1	1	1	1	1	1	1	1
	secG		1	1	1	1	1	1	1	1	1	1	1	1	1	1	1	1	1	1	1	1	1
Accessory Sec secretion system
Accessory Sec system protein translocase subunit SecY2	secY2		1	1	1	1	1	1	1	1	1	1	1	1	1	1	1	1	1	1	1	1	1
Accessory Sec system proteins 1-3	asp1		0.97	1	1	1	1	1	1	1	1	1	1	1	1	1	1	1	1	1	1	1	1
	asp2		1	1	1	1	1	1	1	1	1	1	1	1	1	1	1	1	1	1	1	1	1
	asp3		1	1	1	1	1	1	1	1	1	1	1	1	1	1	1	1	1	1	1	1	1
Protein translocase subunit SecA 2	secA2		0.97	1	1	1	1	1	1	1	1	1	1	1	1	1	1	1	1	1	1	1	1
Regulatory genes
Accessory gene regulator	agrA		1	1	1	1	1	1	1	1	1	1	1	1	1	1	1	1	1	1	1	1	1
	agrB		1	1	1	1	1	1	1	1	1	1	1	1	1	1	1	1	1	1	1	1	1
	agrC		1	1	1	1	1	1	1	1	1	1	1	1	1	1	1	1	1	1	1	1	1
	agrD		0.94	1	1	1	1	1	1	1	1	1	1	1	1	1	1	1	1	1	1	1	1
GTP-sensing pleiotropic transcriptional regulator CodY	CodY		1	1	1	1	1	1	1	1	1	1	1	1	1	1	1	1	1	1	1	1	1
RNA polymerase sigma factor SigB	SigB		1	1	1	1	1	1	1	1	1	1	1	1	1	1	1	1	1	1	1	1	1
Membrane-embedded CAAX protease MroQ	MroQ	A0A0H2XEK8	—	1	1	1	1	1	1	1	1	1	1	1	1	1	1	1	1	1	1	1	1
HTH-type transcriptional regulator rot	rot		1	1	1	1	1	1	1	1	1	1	1	1	1	1	1	1	1	1	1	1	1
Staphylococcal accessory regulator A	sarA		1	1	1	1	1	1	1	1	1	1	1	1	1	1	1	1	1	1	1	1	1
Staphylococcal accessory regulator A (sarA) homologs	sarB	—	—	ND	ND	ND	ND	ND	ND	ND	ND	ND	ND	ND	ND	ND	ND	ND	ND	ND	ND	ND	ND
	sarD	—	—	ND	ND	ND	ND	ND	ND	ND	ND	ND	ND	ND	ND	ND	ND	ND	ND	ND	ND	ND	ND
	sarR		1	1	1	1	1	1	1	1	1	1	1	1	1	1	1	1	1	1	1	1	1
	sarS		1	1	1	1	1	1	1	1	1	1	1	1	1	1	1	1	1	1	1	1	1
	sarT	Q7A3K1	0.7	1	0	1	0	0	0	0	0	0	1	1	0	0	1	0	1	0	1	0	0
	sarU	Q7A004	0.7	1	0	1	0	0	0	0	0	0	1	1	0	0	1	0	1	0	1	0	0
	sarV		1	1	1	1	1	1	1	1	1	1	1	1	1	1	1	1	1	1	1	1	1
	sarX		1	1	1	1	1	1	1	1	1	1	1	1	1	1	1	1	1	1	1	1	1
	sarY		1	1	1	1	1	1	1	1	1	1	1	1	1	1	1	1	1	1	1	1	1
	sarZ		1	1	1	1	1	1	1	1	1	1	1	1	1	1	1	1	1	1	1	1	1
Two component regulatory sytem saeR/saeS	saeS		1	1	1	1	1	1	1	1	1	1	1	1	1	1	1	1	1	1	1	1	1
	saeR		1	1	1	1	1	1	1	1	1	1	1	1	1	1	1	1	1	1	1	1	1
Response regulator ArlR	arlR		1	1	1	1	1	1	1	1	1	1	1	1	1	1	1	1	1	1	1	1	1
Signal transduction histidine-protein kinase ArlS	arlS		1	1	1	1	1	1	1	1	1	1	1	1	1	1	1	1	1	1	1	1	1
Arsenical resistance operon repressor	arsR		0.7	1	1	1	1	1	1	1	1	1	1	1	1	1	1	1	1	1	1	1	1
Sensor protein kinase GraS and Response regulator protein GraR (Glycopeptide resistance-associated protein R)	graS		1	1	1	1	1	1	1	1	1	1	1	1	1	1	1	1	1	1	1	1	1
	graR		1	1	1	1	1	1	1	1	1	1	1	1	1	1	1	1	1	1	1	1	1
Transcriptional regulatory protein LytR and Sensor histidine kinase/phosphatase LytS	lytR		1	1	1	1	1	1	1	1	1	1	1	1	1	1	1	1	1	1	1	1	1
	lytS		1	1	1	1	1	1	1	1	1	1	1	1	1	1	1	1	1	1	1	1	1
Transcriptional regulatory protein SrrA and Sensor protein SrrB	srrA		1	1	1	1	1	1	1	1	1	1	1	1	1	1	1	1	1	1	1	1	1
	srrB		1	1	1	1	1	1	1	1	1	1	1	1	1	1	1	1	1	1	1	1	1
Response regulator protein VraR and Sensor protein VraS	vraR		1	1	1	1	1	1	1	1	1	1	1	1	1	1	1	1	1	1	1	1	1
	vraS		1	1	1	1	1	1	1	1	1	1	1	1	1	1	1	1	1	1	1	1	1
Two-component regulatory system HssS/HssR: Heme response regulator HssR and Heme sensor protein HssS	hssR		1	1	1	1	1	1	1	1	1	1	1	1	1	1	1	1	1	1	1	1	1
	hssS		1	1	1	1	1	1	1	1	1	1	1	1	1	1	1	1	1	1	1	1	1
Transcriptional regulatory protein WalR and Sensor protein kinase WalK	walR		1	1	1	1	1	1	1	1	1	1	1	1	1	1	1	1	1	1	1	1	1
	walK		1	1	1	1	1	1	1	1	1	1	1	1	1	1	1	1	1	1	1	1	1
YycH domain-containing protein	walH (yycH)		1	1	1	1	1	1	1	1	1	1	1	1	1	1	1	1	1	1	1	1	1
YycI domain-containing protein	walI (yycI)		1	1	1	1	1	1	1	1	1	1	1	1	1	1	1	1	1	1	1	1	1
Bifunctional protein Pyr	pyrR		1	1	1	1	1	1	1	1	1	1	1	1	1	1	1	1	1	1	1	1	1
Signal transduction protein TRAP (Target of RNAIII-activating protein)	traP		1	1	1	1	1	1	1	1	1	1	1	1	1	1	1	1	1	1	1	1	1
Ribonuclease Y (Conserved virulence factor A)	rny (cvfA)	P67278	1	1	1	1	1	1	1	1	1	1	1	1	1	1	1	1	1	1	1	1	1
Conserved virulence factor B	cvfB	Q7A5Q1	1	1	1	1	1	1	1	1	1	1	1	1	1	1	1	1	1	1	1	1	1
Conserved virulence factor C	cvfC	Q99U59	1	1	1	1	1	1	1	1	1	1	1	1	1	1	1	1	1	1	1	1	1
HTH-type transcriptional regulator MgrA (Regulator of autolytic activity)	mgrA	Q2G0B1	1	1	1	1	1	1	1	1	1	1	1	1	1	1	1	1	1	1	1	1	1
Miscellanous genes
Methicillin-resistant surface protein (Antiadhesin Pls)	pls	P80544	0.03	0	0	0	0	0	0	0	0	0	0	0	0	0	0	0	0	0	0	0	0
Epidermal cell differentation inhibitor	edin	P24121	—	0	0	0	0	0	0	0	0	0	0	0	0	0	0	0	0	0	0	0	0
	edinB	—	—	ND	ND	ND	ND	ND	ND	ND	ND	ND	ND	ND	ND	ND	ND	ND	ND	ND	ND	ND	ND
	edinC	—	—	ND	ND	ND	ND	ND	ND	ND	ND	ND	ND	ND	ND	ND	ND	ND	ND	ND	ND	ND	ND
Bifunctional autolysin	atl (nag)	P0C5Z8	1	1	1	1	1	1	1	1	1	1	1	1	1	1	1	1	1	1	1	1	1
Processive diacylglycerol beta-glucosyltransferase	ugtP (ypfP)		1	1	1	1	1	1	1	1	1	1	1	1	1	1	1	1	1	1	1	1	1
Glycerol phosphate lipoteichoic acid synthase	ltaS (itaS)	Q7A1I3	1	1	1	1	1	1	1	1	1	1	1	1	1	1	1	1	1	1	1	1	1
Probable glycolipid permease LtaA (Lipoteichoic acid protein A)	ltaA	Q2YWW7	1	1	1	1	1	1	1	1	1	1	1	1	1	1	1	1	1	1	1	1	1
Poly(ribitol-phosphate) beta-N-acetylglucosaminyltransferase TarS	tarS	A0A0H3JPC6	1	1	1	1	1	1	1	1	1	1	1	1	1	1	1	1	1	1	1	1	1
D-alanine--poly(phosphoribitol) ligase subunits 1 and 2	dltA		1	1	1	1	1	1	1	1	1	1	1	1	1	1	1	1	1	1	1	1	1
	dltC		1	1	1	1	1	1	1	1	1	1	1	1	1	1	1	1	1	1	1	1	1
D-alanyl-lipoteichoic acid biosynthesis protein DltB	dltB		1	1	1	1	1	1	1	1	1	1	1	1	1	1	1	1	1	1	1	1	1
D-alanyl-lipoteichoic acid biosynthesis protein DltD	dltD		1	1	1	1	1	1	1	1	1	1	1	1	1	1	1	1	1	1	1	1	1
Chaperone protein ClpB	clpB		1	1	1	1	1	1	1	1	1	1	1	1	1	1	1	1	1	1	1	1	1
ATP-dependent Clp protease ATP-binding subunit ClpC	clpC	Q2G0P5	1	1	1	1	1	1	1	1	1	1	1	1	1	1	1	1	1	1	1	1	1
ATP-dependent Clp protease ATP-binding subunit ClpL	clpL	Q2FV74	1	1	1	1	1	1	1	1	1	1	1	1	1	1	1	1	1	1	1	1	1
ATP-dependent Clp protease proteolytic subunit	clpP		1	1	1	1	1	1	1	1	1	1	1	1	1	1	1	1	1	1	1	1	1
ATP-dependent Clp protease ATP-binding subunit ClpX	clpX		1	1	1	1	1	1	1	1	1	1	1	1	1	1	1	1	1	1	1	1	1
Urease subunits	ureA		1	1	1	1	1	1	1	1	1	1	1	1	1	1	1	1	1	1	1	1	1
	ureB		1	1	1	1	1	1	1	1	1	1	1	1	1	1	1	1	1	1	1	1	1
	ureC		1	1	1	1	1	1	1	1	1	1	1	1	1	1	1	1	1	1	1	1	1
Urease accessory proteins	ureD		1	1	1	1	1	1	1	1	1	1	1	1	1	1	1	1	1	1	1	1	1
	ureE		1	1	1	1	1	1	1	1	1	1	1	1	1	1	1	1	1	1	1	1	1
	ureF		1	1	1	1	1	1	1	1	1	1	1	1	1	1	1	1	1	1	1	1	1
	ureG		1	1	1	1	1	1	1	1	1	1	1	1	1	1	1	1	1	1	1	1	1
Immunogenic proteins
Probable transglycosylase IsaA	isaA		1	1	1	1	1	1	1	1	1	1	1	1	1	1	1	1	1	1	1	1	1
Immunodominant staphylococcal antigen B	isaB		1	1	1	1	1	1	1	1	1	1	1	1	1	1	1	1	1	1	1	1	1
Staphylococcal secretory antigen ssaA1	ssaA1		1	1	1	1	1	1	1	1	1	1	1	1	1	1	1	1	1	1	1	1	1
Staphylococcal secretory antigen ssaA2	ssaA2			1	1	1	1	1	1	1	1	1	1	1	1	1	1	1	1	1	1	1	1
Staphyloxanthin biosynthesis pathway
4,4'-diapophytoene synthase (DAP synthase) (C30 carotenoid synthase) (Dehydrosqualene synthase)	crtM		0.97	1	1	1	1	1	1	1	1	1	1	1	1	1	1	1	1	1	1	1	1
4,4'-diaponeurosporen-aldehyde dehydrogenase (4,4'-diaponeurosporenal dehydrogenase)	aldH		1	1	1	1	1	1	1	1	1	1	1	1	1	1	1	1	1	1	1	1	1
4,4'-diaponeurosporene oxygenase (4,4'-diaponeurosporene oxidase) (Carotenoid oxidase)	crtP		0.97	1	1	1	1	1	1	1	1	1	1	1	1	1	1	1	1	1	1	1	1
4,4'-diapophytoene desaturase (4,4'-diaponeurosporene-forming)	crtN		0.97	1	1	1	1	1	1	1	1	1	1	1	1	1	1	1	1	1	1	1	1
Glycosyl-4,4'-diaponeurosporenoate acyltransferase	crtO		0.97	1	1	1	1	1	1	1	1	1	1	1	1	1	1	1	1	1	1	1	1
4,4'-diaponeurosporenoate glycosyltransferase	crtQ		0.97	1	1	1	1	1	1	1	1	1	1	1	1	1	1	1	1	1	1	1	1
Pyrimidine biosynthesis pathway genes
Bifunctional pyrimidine operon transcriptional regulator/uracil phosphoribosyltransferase	pyrR	Q2YXH0	1	1	1	1	1	1	1	1	1	1	1	1	1	1	1	1	1	1	1	1	1
Aspartate carbamoyltransferase	pyrB			1	1	1	1	1	1	1	1	1	1	1	1	1	1	1	1	1	1	1	1
Dihydroorotase	pyrC			1	1	1	1	1	1	1	1	1	1	1	1	1	1	1	1	1	1	1	1
Dihydroorotate dehydrogenase 2	pyrD			1	1	1	1	1	1	1	1	1	1	1	1	1	1	1	1	1	1	1	1
Orotate phosphoribosyltransferase	pyrE			1	1	1	1	1	1	1	1	1	1	1	1	1	1	1	1	1	1	1	1
Orotidine 5'-phosphate decarboxylase	pyrF			1	1	1	1	1	1	1	1	1	1	1	1	1	1	1	1	1	1	1	1
a ID of reference sequences used in the blast analysis. ID without brackets, Uniprot; (), Aureowiki; [], other
